# Supplementary material for: Pathways linking pulse pressure to dementia in adults with Down syndrome
Source: PubMed Central journal article supplement — medRxiv. 2023 Oct 26:2023.10.26.23297625. Preprint. [Version 1] doi: 10.1101/2023.10.26.23297625 (PMC10635215; doi:10.1101/2023.10.26.23297625), 2023-10-26
Supplement: NIHPP2023.10.26.23297625v1-supplement-1.pdf [file NIHPP2023.10.26.23297625v1-supplement-1.pdf]

## SUPPLEMENT

### Supplementary Table 1

| BP Measure     | Outcome Measure                   | <i>B</i> | $\beta$ | p-value | 95% CI          |
|----------------|-----------------------------------|----------|---------|---------|-----------------|
| Pulse pressure | Global WMH                        | 0.079    | 0.215   | 0.020*  | (0.013, 0.145)  |
|                | Frontal WMH                       | 0.018    | 0.112   | 0.229   | (-0.011, 0.047) |
|                | Temporal WMH                      | 0.012    | 0.200   | 0.035*  | (0.001, 0.023)  |
|                | Parietal WMH                      | 0.017    | 0.233   | 0.012*  | (0.004, 0.030)  |
|                | Occipital WMH                     | 0.026    | 0.247   | 0.006*  | (0.008, 0.045)  |
|                | Cortical microbleeds <sup>λ</sup> | -0.010   | 0.990   | 0.706   | (0.942, 1.041)  |
|                | Enlarged perivascular spaces      | 0.075    | 0.172   | 0.080   | (-0.009, 0.158) |
|                | Infarcts <sup>λ</sup>             | 0.019    | 1.019   | 0.361   | (0.978, 1.062)  |
|                | Left EC thickness                 | 0.003    | 0.078   | 0.396   | (-0.003, 0.008) |
|                | Right EC thickness                | 0.001    | 0.022   | 0.812   | (-0.006, 0.007) |
|                | Clinical Dementia Diagnosis       | 0.017    | 1.017   | 0.259   | (0.987, 1.049)  |

Sensitivity analysis: excluding participants treated with anti-hypertensive or anti-hypotensive medication. Regression model: Outcome measure ~ BP measure + age + intercept.

\* Significant with a p-value < 0.05

<sup>λ</sup> For these dichotomous dependent variables, logistic regression was applied.  $\beta$  = Exponential ( $\beta$ ) and 95%CI = 95% CI for Exponential ( $\beta$ )

### Supplementary Table 2

| BP Variable  | Outcome Marker                    | <i>B</i> | $\beta$ | p-value | 95% CI          |
|--------------|-----------------------------------|----------|---------|---------|-----------------|
| Systolic BP  | Global WMH                        | 0.048    | 0.153   | 0.087   | (-0.007, 0.103) |
|              | Frontal WMH                       | 0.008    | 0.056   | 0.532   | (-0.017, 0.032) |
|              | Temporal WMH                      | 0.009    | 0.179   | 0.050   | (0.000, 0.018)  |
|              | Parietal WMH                      | 0.010    | 0.167   | 0.063   | (-0.001, 0.021) |
|              | Occipital WMH                     | 0.016    | 0.176   | 0.042*  | (0.001, 0.032)  |
|              | Cortical microbleeds <sup>λ</sup> | -0.016   | 0.984   | 0.450   | (0.945, 1.025)  |
|              | Enlarged Perivascular spaces      | 0.054    | 0.139   | 0.134   | (-0.017, 0.125) |
|              | Infarcts <sup>λ</sup>             | 0.015    | 1.015   | 0.423   | (0.979, 1.052)  |
|              | Left EC thickness                 | 0.002    | 0.061   | 0.488   | (-0.003, 0.007) |
|              | Right EC thickness                | 0.001    | 0.033   | 0.719   | (-0.004, 0.006) |
|              | Clinical Dementia Diagnosis       | 0.016    | 1.016   | 0.224   | (0.990, 1.044)  |
| Diastolic BP | Global WMH                        | -0.007   | -0.015  | 0.871   | (-0.095, 0.080) |
|              | Frontal WMH                       | -0.010   | -0.046  | 0.614   | (-0.048, 0.028) |
|              | Temporal WMH                      | 0.004    | 0.051   | 0.582   | (-0.010, 0.018) |
|              | Parietal WMH                      | -0.001   | -0.010  | 0.912   | (-0.018, 0.016) |
|              | Occipital WMH                     | 0.000    | 0.000   | 1.000   | (-0.025, 0.025) |
|              | Cortical microbleeds              | -0.023   | 0.008   | 0.212   | (0.914, 1.044)  |
|              | Enlarged perivascular spaces      | -0.005   | -0.009  | 0.921   | (-0.112, 0.101) |
|              | Infarcts <sup>λ</sup>             | -0.003   | 0.997   | 0.907   | (0.945, 1.052)  |
|              | Left EC thickness                 | -0.002   | -0.045  | 0.618   | (-0.010, 0.006) |
|              | Right EC thickness                | 0.000    | 0.002   | 0.984   | (-0.008, 0.009) |
|              | Clinical Dementia Diagnosis       | 0.009    | 1.009   | 0.633   | (-0.973, 1.045) |
|              | Global WMH                        | 0.032    | 0.068   | 0.454   | (-0.052, 0.115) |

|                        |                              |        |        |       |                 |
|------------------------|------------------------------|--------|--------|-------|-----------------|
| Mean Arterial Pressure | Frontal WMH                  | 0.000  | -0.001 | 0.992 | (-0.037, 0.036) |
|                        | Temporal WMH                 | 0.009  | 0.123  | 0.184 | (-0.004, 0.023) |
|                        | Parietal WMH                 | 0.007  | 0.078  | 0.393 | (-0.009, 0.023) |
|                        | Occipital WMH                | 0.012  | 0.089  | 0.313 | (-0.012, 0.036) |
|                        | Cortical microbleeds         | -0.027 | 0.974  | 0.407 | (0.914, 1.037)  |
|                        | Enlarged perivascular spaces | 0.035  | 0.062  | 0.509 | (-0.070, 0.139) |
|                        | Infarcts <sup>λ</sup>        | 0.009  | 1.009  | 0.746 | (0.957, 1.064)  |
|                        | Left EC thickness            | 0.000  | 0.002  | 0.978 | (-0.008, 0.008) |
|                        | Right EC thickness           | 0.001  | 0.018  | 0.845 | (-0.008, 0.009) |
|                        | Clinical Dementia Diagnosis  | 0.016  | 1.017  | 0.376 | (0.980, 1.054)  |

Regression model: Outcome measure ~ BP measure + age + intercept.

\* For these dichotomous dependent variables, logistic regression was applied.  $\beta$  = Exponential ( $\beta$ ) and 95%CI = 95% CI for Exponential ( $\beta$ )
